# Supplementary material for: Preclinical PET Imaging and Toxicity Study of a 68Ga-Functionalized Polymeric Cardiac Blood Pool Agent
Source: MDPI journal article supplement (doi:10.3390/pharmaceutics15030767), 2023-02-25
Supplement: s1 [file s1]

## Supplemental Information

# Preclinical PET Imaging and Toxicity Study of a $^{68}\text{Ga}$ -Functionalized Polymeric Cardiac Blood Pool Agent

Katayoun Saatchi, PhD<sup>1\*</sup>, François Bénard, MD, PhD<sup>2,3</sup>, Navjit Hundal<sup>3</sup>, Joshua Grimes<sup>2</sup>, Sergey Shcherbinin, PhD<sup>2</sup>, Maral Pourghiasian<sup>3</sup>, Donald E. Brooks, PhD<sup>4</sup>, Anna Celler, PhD<sup>2</sup>, and Urs O. Häfeli, PhD<sup>1\*</sup>

<sup>1</sup>Faculty of Pharmaceutical Sciences, University of British Columbia, Vancouver, BC V6T 1Z3, Canada, <sup>2</sup>Department of Radiology, University of British Columbia, Vancouver, BC V5Z 1M9, Canada, <sup>3</sup>BC Cancer, Vancouver, BC V5Z 4E6, Canada, <sup>4</sup>Department of Pathology and Laboratory Medicine, University of British Columbia, Vancouver, BC V6T 1Z3 Canada

**Keywords:** Ga-68, hyperbranched polyglycerol, non-toxic polymer, macromolecule, blood pool imaging agent, PET radiopharmaceutical, internal dosimetry

\* Corresponding authors: [urs.hafeli@ubc.ca](mailto:urs.hafeli@ubc.ca) (U.O.H.); [kathy.saatchi@ubc.ca](mailto:kathy.saatchi@ubc.ca) (K.S.)

## Supplemental Video S1:

The attached video shows a representative movie of the beating heart of a healthy Sprague Dawley rat reconstructed from the gated  $^{68}\text{Ga}$ -HPG PET images.

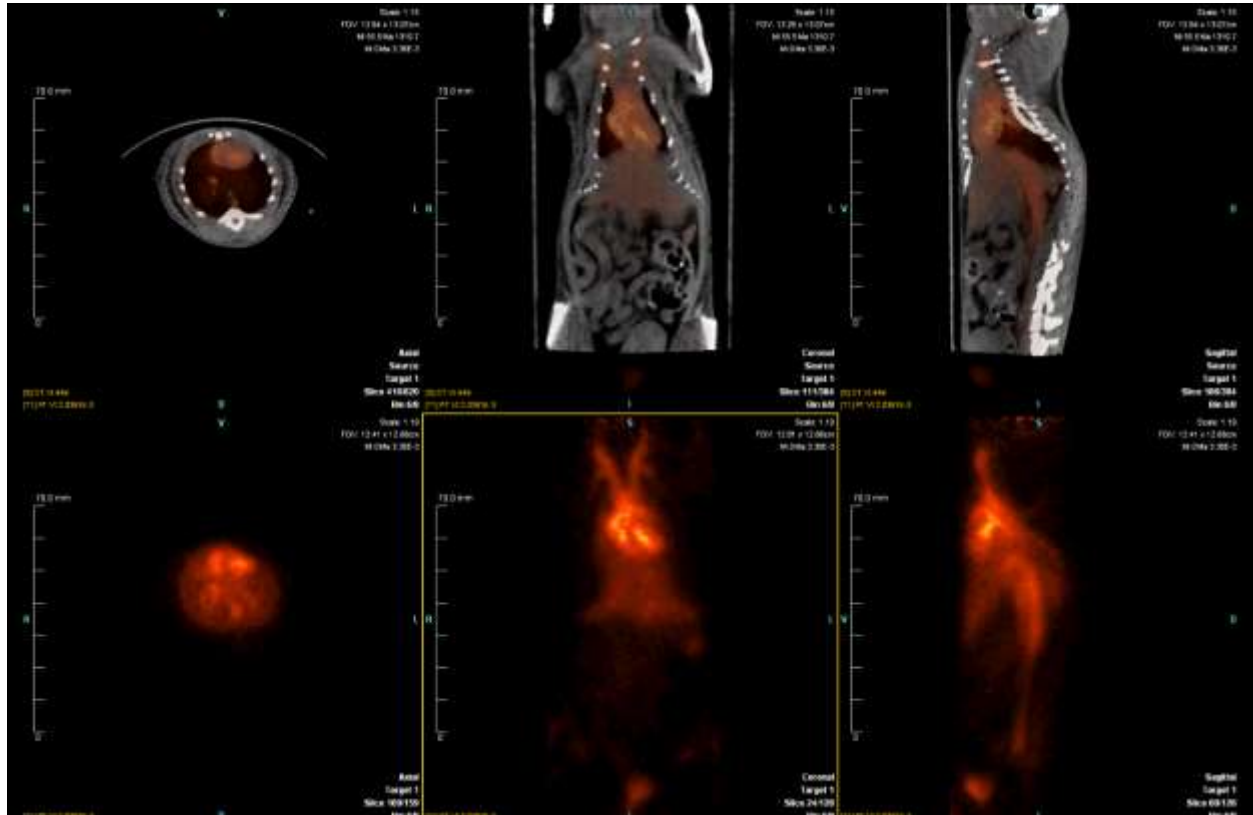

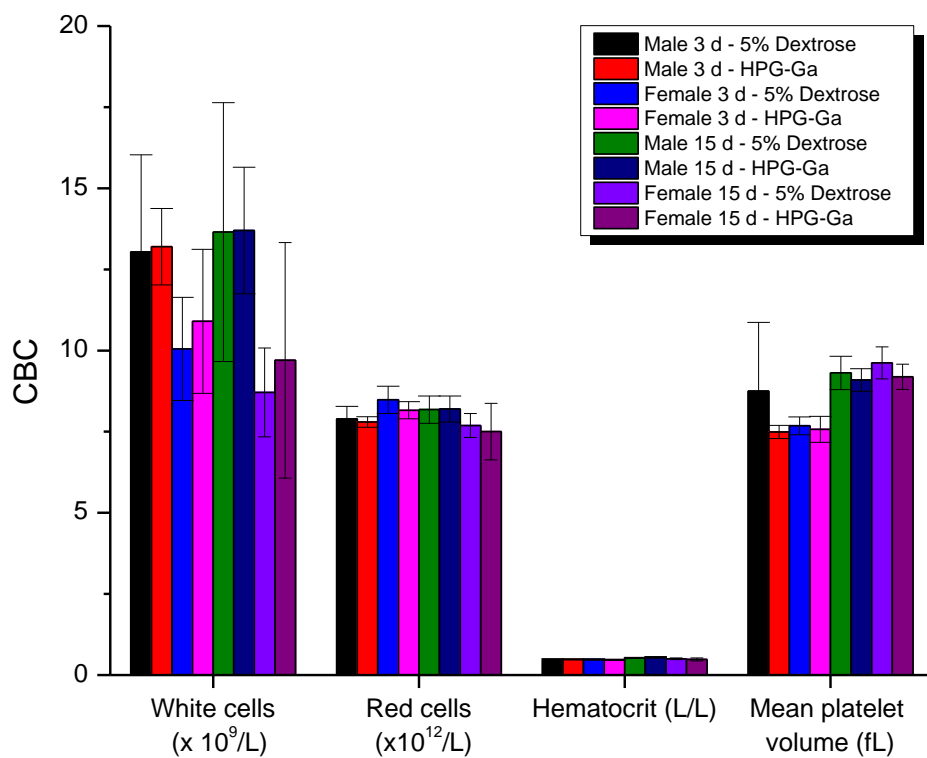

**Figure S1.**

Analysis of complete blood counts (CBC) on Day 3 and 15 from all Sprague Dawley rats ( $n = 10$  per group). The values shown here include the number of white and red cells, the hematocrit and the mean platelet volume.

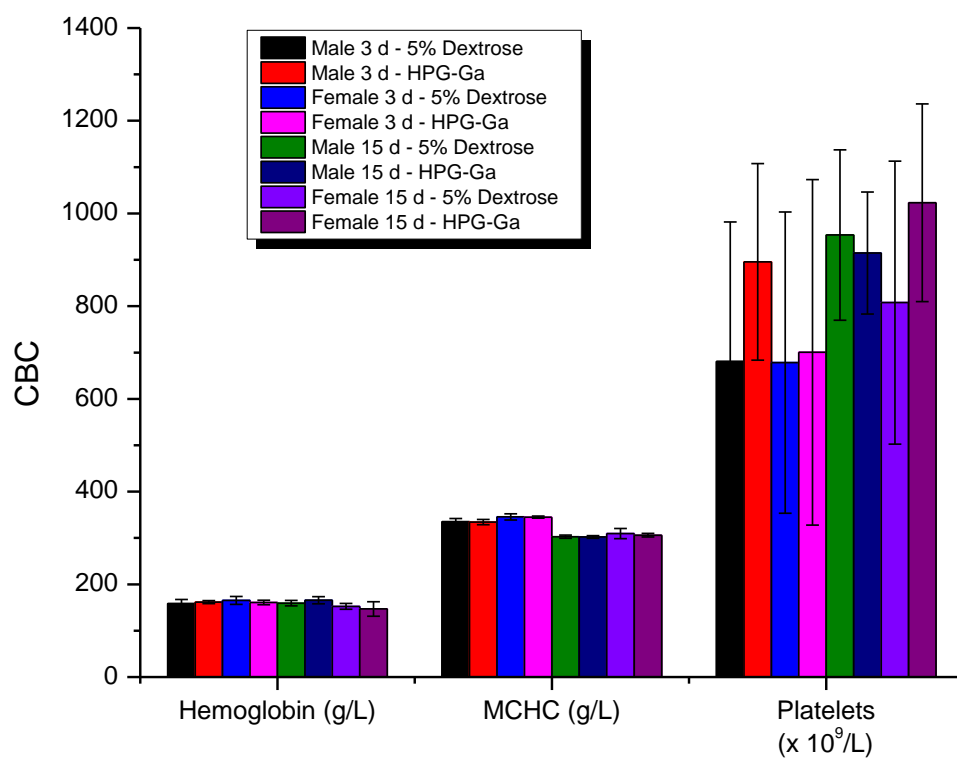

**Figure S2.**

Additional values determined during the CBC including the hemoglobin concentration, the mean corpuscular hemoglobin concentration (MCHC) and the platelets number.

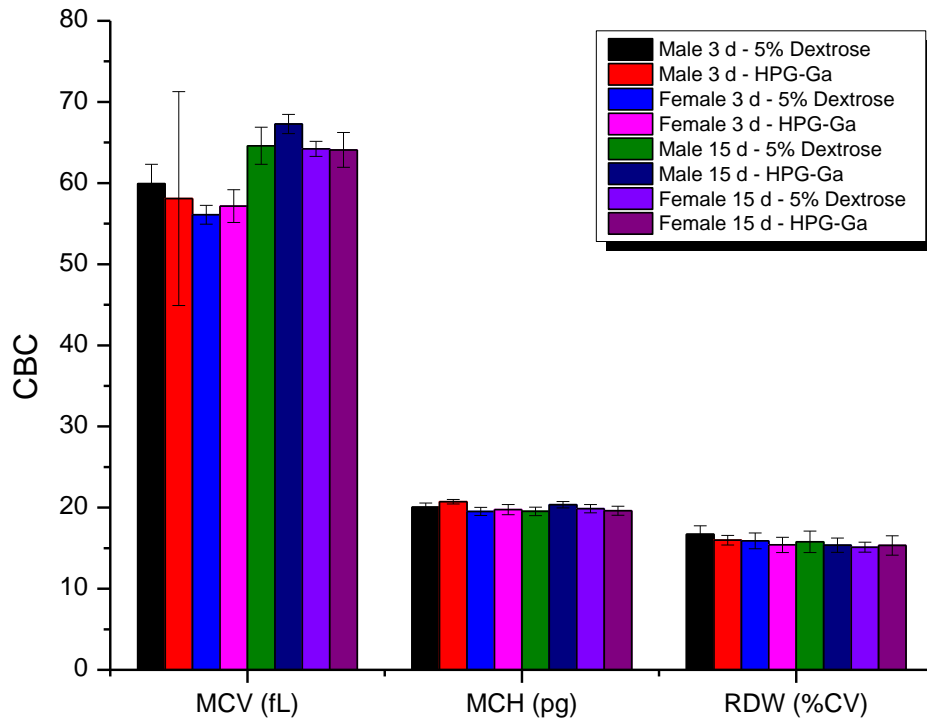

**Figure S3.**

Additional values determined during the CBC including the mean corpuscular volume (MCV), mean corpuscular hemoglobin (MCH) and the red cell distribution width (RDW).
